# Supplementary material for: Thirty-Day Complications, Unplanned Hospital Encounters, and Mortality after Endosonography and/or Guided Bronchoscopy: A Prospective Study
Source: MDPI journal article supplement (doi:10.3390/cancers15184531), 2023-09-12
Supplement: s1 [file s1]

Table S1. Demographic, epidemiological, clinical and procedural characteristics between 30-day complications groups.

| Variable                                               | No complications<br>(n = 615) | Complications<br>(n = 82) | p-value |
|--------------------------------------------------------|-------------------------------|---------------------------|---------|
| <b>Median (IQR) age, years</b>                         | 67 (58-75)                    | 68.5 (56-75)              | 0.81    |
| <b>Males, No. (%)</b>                                  | 350 (56.9)                    | 49 (59.8)                 | 0.63    |
| <b>Smoking, No. (%)</b>                                |                               |                           |         |
| Current                                                | 189 (30.7)                    | 27 (32.9)                 | 0.99    |
| Former                                                 | 275 (44.7)                    | 35 (42.7)                 |         |
| Never                                                  | 151 (24.6)                    | 20 (24.4)                 |         |
| <b>Median (IQR) CCI, No. (%)</b>                       | 4 (2-5)                       | 4 (2-5)                   | 0.88    |
| <b>Median (IQR) ASA score, No. (%)</b>                 | 2 (2-2)                       | 2 (2-2)                   | 0.64    |
| <b>Fever, No. (%)</b>                                  | 13 (2.1)                      | 4 (4.9)                   | 0.13    |
| <b>Dyspnea, mMRC, No. (%)</b>                          |                               |                           |         |
| 0                                                      | 83 (13.5)                     | 8 (9.8)                   | 0.32    |
| I                                                      | 241 (39.2)                    | 26 (31.7)                 |         |
| II                                                     | 202 (32.9)                    | 31 (37.8)                 |         |
| III                                                    | 81 (13.2)                     | 16 (19.5)                 |         |
| IV                                                     | 8 (1.3)                       | 1 (1.2)                   |         |
| <b>Sputum production, No. (%)</b>                      |                               |                           |         |
| No                                                     | 442 (71.9)                    | 46 (56.1)                 | 0.003   |
| Yes, whitish                                           | 122 (19.8)                    | 28 (34.2)                 | 0.003   |
| Yes, purulent                                          | 32 (5.2)                      | 3 (3.7)                   | 0.55    |
| Yes, hemoptysis                                        | 19 (3.1)                      | 5 (6.1)                   | 0.16    |
| <b>Setting, No. (%)</b>                                |                               |                           |         |
| Inpatient                                              | 344 (55.9)                    | 48 (58.5)                 | 0.66    |
| Outpatient                                             | 271 (44.1)                    | 34 (41.5)                 |         |
| <b>Procedure type, No. (%)</b>                         |                               |                           |         |
| Endosonography                                         | 358 (58.2)                    | 48 (58.5)                 | 0.97    |
| Guided bronchoscopy                                    | 164 (26.7)                    | 21 (25.6)                 |         |
| Endosonography + Guided bronchoscopy                   | 93 (15.1)                     | 13 (15.9)                 |         |
| <b>Endosonography type, No. (%)</b>                    |                               |                           |         |
| None                                                   | 164 (26.7)                    | 21 (25.6)                 | 0.96    |
| EBUS                                                   | 415 (67.5)                    | 56 (68.3)                 |         |
| EUS-B                                                  | 30 (4.9)                      | 4 (4.9)                   |         |
| EBUS + EUS-B                                           | 6 (1.0)                       | 1 (1.2)                   |         |
| <b>Median (IQR) procedure duration, minutes</b>        | 29 (23-37)                    | 31.5 (27-35)              | 0.13    |
| <b>Median (IQR) n. of biopsy targets</b>               | 1 (1-2)                       | 1 (1-2)                   | 0.44    |
| <b>Target lesion, No. (%)</b>                          |                               |                           |         |
| Lymph node                                             | 293 (47.6)                    | 34 (41.5)                 | 0.49    |
| Lung lesion                                            | 194 (31.5)                    | 27 (32.9)                 |         |
| Lymph node + lung lesion                               | 128 (20.8)                    | 21 (25.6)                 |         |
| <b>LDA in target lesion at CT, No. (%)</b>             |                               |                           |         |
| No                                                     | 477 (77.6)                    | 54 (65.9)                 | 0.02    |
| Yes, lymph node(s)                                     | 73 (11.9)                     | 10 (12.2)                 | 0.93    |
| Yes, lung lesion(s)                                    | 43 (7.0)                      | 11 (13.4)                 | 0.04    |
| Yes, lymph node(s) + lung lesion(s)                    | 22 (3.6)                      | 7 (8.5)                   | 0.04    |
| <b>CNS in target lesion at endosonography, No. (%)</b> | 37 (8.2)                      | 9 (14.8)                  | 0.09    |
| <b>Peri-procedural antibiotic treatment, No. (%)</b>   |                               |                           |         |
| None                                                   | 542 (88.1)                    | 67 (81.7)                 | 0.10    |
| Prophylactic                                           | 15 (2.4)                      | 0 (0.0)                   | 0.15    |
| During/Post-procedure                                  | 58 (9.4)                      | 15 (18.3)                 | 0.01    |

**Abbreviations:** IQR: interquartile range; BMI: Body Mass Index; ASA: American Society of Anesthesiologists; mMRC: modified British Medical Research Council; EBUS: Endobronchial Ultrasound; EUS-B: Endoscopic Ultrasound with Bronchoscope; LDA: low-dose attenuation; CT: computed tomography; CNS: coagulation necrosis sign.

**Table S2. Detailed list of severe and non-severe complications by procedure type**

| Variable                    |                                                |    |                                                |   |                                          |   |
|-----------------------------|------------------------------------------------|----|------------------------------------------------|---|------------------------------------------|---|
| Endosonography              |                                                |    | Guided bronchoscopy                            |   | Endosonography + guided bronchoscopy     |   |
| Severe complications        | Type                                           | n  | Type                                           | n | Type                                     | n |
|                             | Respiratory failure                            | 5  | Bleeding grade $\geq 3^*$                      | 1 | Air embolism                             | 1 |
|                             | Acute coronary syndrome                        | 1  | Pulmonary infection                            | 1 | Pneumothorax                             | 1 |
|                             | Pulmonary infection                            | 1  | Severe hemoptysis <sup>§</sup>                 | 1 | Pulmonary infection with empyema         | 1 |
|                             | Mediastinitis                                  | 1  |                                                |   | Severe hemoptysis <sup>§</sup>           | 1 |
|                             | Lidocaine-induced anaphylactic shock           | 1  |                                                |   | Acute exacerbation of pulmonary fibrosis | 1 |
| Mild/Moderate complications | Type                                           | n  | Type                                           | n | Type                                     | n |
|                             | Laryngospasm or bronchospasm                   | 12 | Bleeding grade $\leq 2$                        | 8 | Laryngospasm or bronchospasm             | 3 |
|                             | Bleeding grade $\leq 2$                        | 6  | Laryngospasm or bronchospasm                   | 2 | Bleeding grade $\leq 2$                  | 2 |
|                             | Fever > 8 h                                    | 5  | Hemoptysis                                     | 2 | Hemoptysis                               | 2 |
|                             | Hemoptysis                                     | 5  | Worsening dyspnea <sup>^</sup>                 | 2 | Fever > 8 h                              | 1 |
|                             | Fever                                          | 5  | Transient but sustained (<80%, >5 min) hypoxia | 1 | Fever                                    | 1 |
|                             | Worsening dyspnea <sup>^</sup>                 | 2  | Fever > 8 h                                    | 1 |                                          |   |
|                             | Transient but sustained (<80%, >5 min) hypoxia | 2  | Transient (< 24 h) respiratory failure         | 1 |                                          |   |
|                             | Transient (< 24 h) respiratory failure         | 1  | Persistent sore throat                         | 1 |                                          |   |
|                             | Persistent sore throat                         | 1  | Vasovagal syncope                              | 1 |                                          |   |
|                             | Persistent headache/vomiting                   | 1  | Fever                                          | 1 |                                          |   |

<sup>\*</sup>Blood loss occurring during the procedure was referred to as “bleeding” and was graded using the Nashville Working Group scale [28]. Blood loss occurring  $\geq 24$  after the procedure, and not directly seen by one of the investigators, was referred to as “hemoptysis”. Hemoptysis was considered procedure-related if it occurred for the first time during endosonography and/or guided bronchoscopy and recurred within 30 days of the procedure. Hemoptysis was considered severe if it led to an UHE.

<sup>\*</sup> Marked worsening, after endosonography and/or guided bronchoscopy, of dyspnea already present before the procedure with no alternative cause found.

<sup>^</sup> Fever > 38°C occurring after the procedure, with duration > 12 hours and requiring antibiotic treatment because of lack of response to paracetamol.

**Table S3. Logistic regression analysis to assess relationship between demographic, clinical, procedural characteristics, and 30-day complications.**

| Variables                                     | Univariate analysis |         | Multivariate analysis |         |
|-----------------------------------------------|---------------------|---------|-----------------------|---------|
|                                               | OR 95% CI           | p-value | OR 95% CI             | p-value |
| <b>Age, years</b>                             | 1.00 (0.89-1.02)    | 0.85    | 0.99 (0.97-1.01)      | 0.49    |
| <b>Males</b>                                  | 1.12 (0.70-1.80)    | 0.63    | 1.02 (0.63-1.65)      | 0.95    |
| <b>Smoking habit</b>                          |                     |         |                       |         |
| Never                                         | Ref.                | Ref.    | Ref.                  | Ref.    |
| Current                                       | 1.09 (0.58-2.00)    | 0.15    | -                     | -       |
| Former                                        | 0.96 (0.54-1.72)    | 0.89    | -                     | -       |
| <b>CCI</b>                                    | 1.00 (0.91-1.09)    | 0.94    | -                     | -       |
| <b>ASA score</b>                              | 1.13 (0.78-1.61)    | 0.53    | -                     | -       |
| <b>Fever</b>                                  |                     |         |                       |         |
| Yes                                           | Ref.                | Ref.    | Ref.                  | Ref.    |
| No                                            | 0.42 (0.13-1.32)    | 0.14    | -                     | -       |
| <b>Dyspnea (mMRC)</b>                         |                     |         |                       |         |
| 0                                             | Ref.                | Ref.    | Ref.                  | Ref.    |
| 1                                             | 1.12 (0.48-2.57)    | 0.79    | -                     | -       |
| 2                                             | 1.59 (0.70-3.61)    | 0.27    | -                     | -       |
| 3-4                                           | 1.98 (0.81-4.84)    | 0.13    | -                     | -       |
| <b>Sputum production</b>                      | 2.0 (1.25-3.20)     | 0.004   | 2.09 (1.29-3.39)      | 0.003   |
| <b>Setting</b>                                |                     |         |                       |         |
| Outpatient                                    | Ref.                | Ref.    | Ref.                  | Ref.    |
| Inpatient                                     | 1.11 (0.70-1.78)    | 0.66    | -                     | -       |
| <b>Underlying disease</b>                     |                     |         |                       |         |
| Other                                         | Ref.                | Ref.    | Ref.                  | Ref.    |
| Malignancy                                    | 0.88 (0.46-1.65)    | 0.68    | -                     | -       |
| <b>Procedure type</b>                         |                     |         |                       |         |
| Endosonography + Guided bronchoscopy          | Ref.                | Ref.    | Ref.                  | Ref.    |
| Endosonography                                | 0.96 (0.49-1.85)    | 0.90    | -                     | -       |
| Guided bronchoscopy                           | 0.92 (0.44-1.91)    | 0.82    | -                     | -       |
| <b>Endosonography type</b>                    |                     |         |                       |         |
| None                                          | Ref.                | Ref.    | Ref.                  | Ref.    |
| EBUS/EUS-B/EBUS-EUS-B                         | 1.06 (0.62-1.79)    | 0.84    | -                     | -       |
| <b>Procedure duration, min</b>                | 1.01 (0.99-1.03)    | 0.33    | -                     | -       |
| <b>N. of biopsy targets</b>                   | 1.10 (0.87-1.40)    | 0.42    | -                     | -       |
| <b>Target lesion</b>                          |                     |         |                       |         |
| Lymph node                                    | Ref.                | Ref.    | Ref.                  | Ref.    |
| Lung lesion                                   | 1.20 (0.70-2.05)    | 0.51    | -                     | -       |
| Lymph node + lung lesion                      | 1.41 (0.70-2.05)    | 0.24    | -                     | -       |
| <b>N. of sampled lymph nodes</b>              | 1.01 (0.84-2.02)    | 0.91    | -                     | -       |
| <b>N. of sampled lung lesions</b>             | 1.30 (0.72-4.59)    | 0.24    | -                     | -       |
| <b>N. of needle passes</b>                    | 1.04 (0.95-1.14)    | 0.34    | -                     | -       |
| <b>LDA in target lesion at CT</b>             |                     |         |                       |         |
| lymph node/lung/both                          | 1.79 (1.09-2.94)    | 0.02    | 1.87 (1.13-3.09)      | 0.01    |
| <b>CNS in target lesion at endosonography</b> |                     |         |                       |         |
| Yes                                           | Ref.                | Ref.    | Ref.                  | Ref.    |
| No                                            | 0.52 (0.24-1.13)    | 0.10    | -                     | -       |
| <b>Peri-procedural antibiotic treatment</b>   |                     |         |                       |         |
| Yes                                           | Ref.                | Ref.    | Ref.                  | Ref.    |
| No                                            | 0.60 (0.33-1.11)    | 0.10    | -                     | -       |

**Abbreviations:** CCI: Charlson Comorbidity Index; ASA: American Society of Anesthesiologists; mMRC: modified British Medical Research Council; EBUS: Endobronchial Ultrasound; EUS-B: Endoscopic Ultrasound with Bronchoscope; LDA: low-dose attenuation; CT: computed tomography; CNS: coagulation necrosis sign.

**Table S3. Logistic regression analysis to assess relationship between demographic, clinical, procedural characteristics, and unplanned hospital encounters.**

| Variables                            | Univariate analysis |         | Multivariate analysis |         |
|--------------------------------------|---------------------|---------|-----------------------|---------|
|                                      | OR 95% CI           | p-value | OR 95% CI             | p-value |
| <b>Age, years</b>                    | 1.03 (1.00-1.06)    | 0.06    | 1.01 (0.97-1.04)      | 0.67    |
| <b>Males</b>                         | 1.13 (0.59-2.16)    | 0.72    | 0.96 (0.48-1.89)      | 0.89    |
| <b>Smoking habit</b>                 |                     |         |                       |         |
| Never                                | Ref.                | Ref.    | Ref.                  | Ref.    |
| Current                              | 1.50 (0.59-3.85)    | 0.40    | -                     | -       |
| Former                               | 1.62 (0.67-3.90)    | 0.26    | -                     | -       |
| <b>CCI</b>                           | 1.16 (1.03-1.31)    | 0.01    | 1.09 (0.95-1.26)      | 0.24    |
| <b>ASA score</b>                     | 1.24 (0.77-2.10)    | 0.34    | -                     | -       |
| <b>Fever</b>                         |                     |         |                       |         |
| Yes                                  | Ref.                | Ref.    | Ref.                  | Ref.    |
| No                                   | 0.97 (0.13-7.53)    | 0.98    | -                     | -       |
| <b>Dyspnea (mMRC)</b>                |                     |         |                       |         |
| 0                                    | Ref.                | Ref.    | Ref.                  | Ref.    |
| 1                                    | 1.02 (0.32-3.26)    | 0.97    | -                     | -       |
| 2                                    | 1.60 (0.52-4.93)    | 0.41    | -                     | -       |
| 3-4                                  | 1.78 (0.52-6.10)    | 0.36    | -                     | -       |
| <b>Sputum production</b>             | 1.00 (1.50-2.01)    | 1.00    | -                     | -       |
| <b>Setting</b>                       |                     |         |                       |         |
| Outpatient                           | Ref.                | Ref.    | Ref.                  | Ref.    |
| Inpatient                            | 2.14 (1.05-4.34)    | 0.04    | 1.61 (0.74-3.50)      | 0.23    |
| <b>Procedure type</b>                |                     |         |                       |         |
| Endosonography + Guided bronchoscopy | Ref.                | Ref.    | Ref.                  | Ref.    |
| Endosonography                       | 1.40 (0.46-2.85)    | 0.78    | -                     | -       |
| Guided bronchoscopy                  | 0.75 (0.25-2.23)    | 0.61    | -                     | -       |
| <b>Endosonography type</b>           |                     |         |                       |         |
| None                                 | Ref.                | Ref.    | Ref.                  | Ref.    |
| EBUS/EUS-B/EBUS-EUS-B                | 1.48 (0.67-3.26)    | 0.34    | -                     | -       |
| <b>Procedure duration, min</b>       | 0.96 (0.93-1.00)    | 0.03    | 0.95 (0.93-1.00)      | 0.04    |
| <b>N. of biopsy targets</b>          | 0.93 (0.65-1.34)    | 0.71    | -                     | -       |
| <b>Target lesion</b>                 |                     |         |                       |         |
| Lymph node                           | Ref.                | Ref.    | Ref.                  | Ref.    |
| Lung lesion                          | 1.05 (0.49-2.24)    | 0.91    | -                     | -       |
| Lymph node + lung lesion             | 1.45 (0.66-3.19)    | 0.35    | -                     | -       |
| <b>N. of sampled lymph nodes</b>     | 0.90 (0.65-1.23)    | 0.50    | -                     | -       |
| <b>N. of sampled lung lesions</b>    | 1.23 (0.67-2.26)    | 0.50    | -                     | -       |
| <b>N. of needle passes</b>           | 1.01 (0.89-1.15)    | 0.85    | -                     | -       |

|                                               |                  |       |                  |      |
|-----------------------------------------------|------------------|-------|------------------|------|
| <b>LDA in target lesion at CT</b>             |                  |       |                  |      |
| lymph node/lung/both                          | 2.81 (1.47-5.39) | 0.002 | 2.17 (1.10-4.30) | 0.03 |
| <b>CNS in target lesion at endosonography</b> |                  |       |                  |      |
| Yes                                           | Ref.             | Ref.  | Ref.             | Ref. |
| No                                            | 0.95 (0.28-3.25) | 0.94  | -                | -    |
| <b>Peri-procedural antibiotic treatment</b>   |                  |       |                  |      |
| Yes                                           | Ref.             | Ref.  | Ref.             | Ref. |
| No                                            | 0.35 (0.17-0.73) | 0.005 | 0.41 (0.19-0.89) | 0.03 |

**Abbreviations:** CCI: Charlson Comorbidity Index; ASA: American Society of Anesthesiologists; mMRC: modified British Medical Research Council; EBUS: Endobronchial Ultrasound; EUS-B: Endoscopic Ultrasound with Bronchoscope; LDA: low-dose attenuation; CT: computed tomography; CNS: coagulation necrosis sign.
